# Supplementary material for: Developing an Effective Peptide-Based Vaccine for COVID-19: Preliminary Studies in Mice Models
Source: MDPI journal article supplement (doi:10.3390/v14030449), 2022-02-22
Supplement: s1 [file s1]

1. Full amino acid sequence of SARS-CoV-2 spike protein (1-1273)

MFVFLVLLPLVSSQCVNLTTRTQLPPAYTNSFTRGVYYPDKVFRSSVLHSTQDLFLPFFSNVTWFHAIHVS GTNGTKRFD  
NPVLPFNDGVYFASTEKSNIIRGWIFGTTLD SKTQSL LIVNNATNVVIKVCEFQFCNDPFLGVYYHKNNKSWMESEFRVY  
SSANNCTFEYVSQPFLMDLEGKQGNFKNLREFVFKNIDGYFKIYSKHTPINLVRDLPQGFSALEPLVDLPIGINITRFQTLL  
ALHRSYLTPGDSSSGWTAGAAAYVGYLQPRTFLLKYNENGTITDAVDCALDPLSETKCTLKSFTVEKGIYQTSNFRVQP  
TESIVRFPNITNLCPFGEVFNATRFASVYAWNRRKRISNCVADYSVLVNSASFSTFKCYGVSPTKLNDLCFTNVYADSFVIR  
GDEV RQIAPGQTGKIADYNYKLPDDFTGCVIAWNSNNLDSKVGGNYNYLYRLFRKSNLKPFERDISTEIQAGSTPCNG  
VEGFNCYFPLQSYGFQPTNGVGYQPYRVVLSFELLHAPATVCGPKKSTNLVKNKCVNFNFNGLTGTGVLTESNKKFLP  
FQQFGRDIADTTDAVRDPQTLEILDITPCSFGGVSVITPGTNTSNQVAVLYQDVNCTEVPVAIHADQLTPTWRVYSTGSN  
VFQTRAGCLIGA EHVNNSECDIPIGAGICASYQTQTN SPRRARSVASQSIIAYTMSLGAENSVAYSNN SIAIPTNFTISVTT  
EILPVSMTKTSVDCTMYICGDSTECSNLLLQYGSFCTQLNRALTGIAVEQDKNTQE VFAQVKQIYKTPPIKDFGGFNFSQI  
LPDPSKPSKRSFIEDLLFNKVTLADAGFIKQYGDCLGDIAARDLICAQKFNGLTVLPPLLTD EMI AQYTSALLAGTITSGW  
TFGAGAAALQIPFAMQMAYRFNGIGVTQNVLYENQKLIANQFN SAIGKIQDSLSTASALGKLQDVVNQNAQALNTLVK  
QLSSNFGAISSVLNDILSRDKVEAEVQIDRLITGRLQSLQTYVTQQLIRAAEIRASANLAATKMSECVLGQSKRVDFCGK  
GYHLM SFPQSAPHGVVFLHVTYVPAQEKNFTTAPAICH DGKAHFPREGVFVSNGTHWFVTQRNFYEPQIITTDNTFVSG  
NCDVVIGIVNNTVYDPLQPELDSFKEELDKYFKNHTSPD VDLGDISGINASVVNIQKEIDRLNEVAKNLNESLIDLQELGK  
YEQYIKWPWYIWLGFIAGLIAIVMVTIMLCCMTSCC SCLKGCCSCGSCCKFDEDDSEPV LKGVKLHYT

## 2. Antigenic prediction of COVID-19 virus spike protein

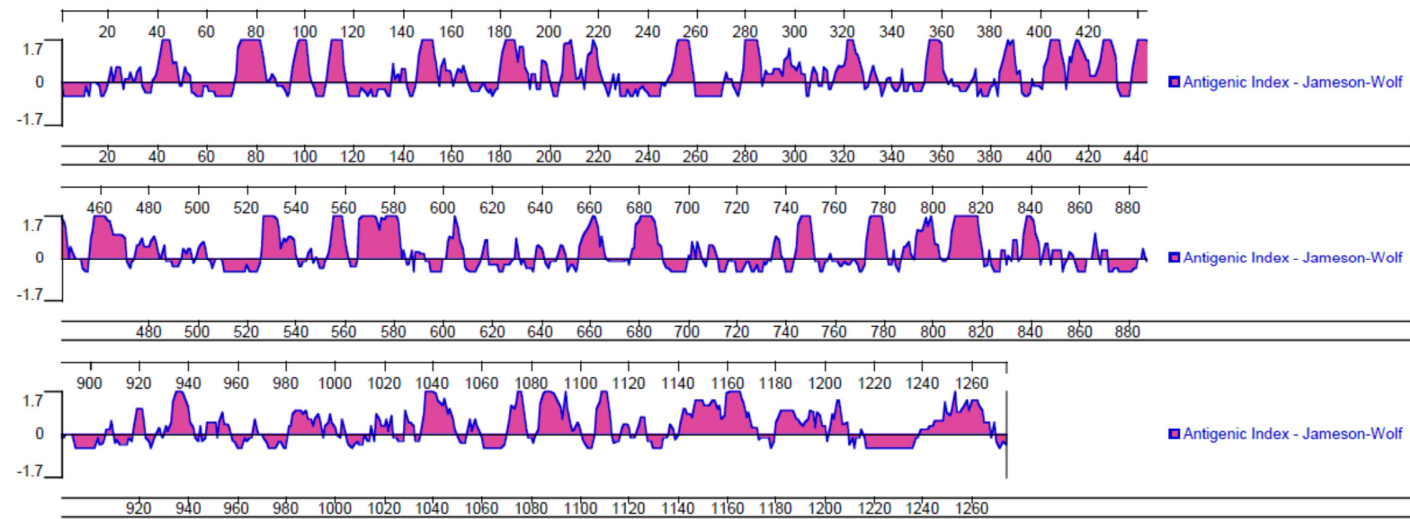

**3. Supplementary Table S1. Selection of SARS-CoV-2 peptides.** Each selected peptide binding to human HLA-I is predicted by using <http://tools.iedb.org/mhci/>, and all alleles are selected and binding of peptide to HLA-II is analyzed using <http://tools.iedb.org/mhcii/>, and peptide length is 15 amino acids against all alleles. Both peptide mixtures with QS21 or Al(OH)<sub>3</sub> induced B and T cell responses in C57BL/6 mice. Furthermore, antibody production against each individual peptide varied with injection time. Using Al(OH)<sub>3</sub> as the adjuvant, the peptide mixtures generated a long-lasting antibody response with an efficacious cellular response. These peptide mixtures, when used as a vaccine, stimulate humoral antibody production, and some peptides could be used to evaluate vaccine effectiveness.

| Peptide name and aa sequences   | AA position     | Binding to MHC-I types                                | Binding to MHC-II types | Human HLA-II                                                                                                                              | Human HLA-I                                                                                                                                                                                       |
|---------------------------------|-----------------|-------------------------------------------------------|-------------------------|-------------------------------------------------------------------------------------------------------------------------------------------|---------------------------------------------------------------------------------------------------------------------------------------------------------------------------------------------------|
| CLPFQQFGRDIADTTDAV<br>RDPQTLEIL | 560-585<br>(A1) | H-2-Dd                                                | N/A                     | HLA-DRB3*01:01                                                                                                                            | HLA-A*26:01; HLA-A*30:01; HLA-A*33:01; HLA-A*68:01; HLA-A*68:02; HLA-B*08:01; HLA-B*35:01; HLA-B*51:01; HLA-B*53:01                                                                               |
| CYFKIYSKHTPINLVRDLP<br>Q        | 200-218<br>(B1) | H-2-Db, H-2-Dd,<br>H-2-Kb, H-2-Kd,<br>H-2-Ld; H-2-Qa1 | H2-IEd, H2-<br>IAb      | HLA-DPA1*02:01/DPB1*14:01; HLA-DRB1*07:01; HLA-DRB1*08:02; HLA-DRB1*09:01; HLA-DRB1*11:01; HLA-DRB1*13:02; HLA-DRB1*15:01; HLA-DRB3*02:02 | HLA-A*02:01; HLA-A*02:03; HLA-A*02:06; HLA-A*23:01; HLA-A*24:02; HLA-A*30:01; HLA-A*32:01; HLA-A*68:02; HLA-B*07:02; HLA-B*08:01; HLA-B*35:01; HLA-B*51:01; HLA-B*53:01; HLA-B*57:01; HLA-B*58:01 |
| CGVYYHKNNKSWMESEF<br>RVY        | 142-160<br>(C1) | H-2-Db, H-2-Kb,<br>H-2-Kd                             | H2-IEd                  | HLA-DPA1*01:03/DPB1*04:01; HLA-                                                                                                           | HLA-A*01:01; HLA-A*03:01; HLA-A*11:01; HLA-A*23:01; HLA-A*24:02; HLA-A*30:01; HLA-A*30:02; HLA-A*31:01; HLA-A*32:01; HLA-B*15:01;                                                                 |

|                                    |                 |                                               |        |                                                                                                          |                                                                                                                                                                                                                             |
|------------------------------------|-----------------|-----------------------------------------------|--------|----------------------------------------------------------------------------------------------------------|-----------------------------------------------------------------------------------------------------------------------------------------------------------------------------------------------------------------------------|
|                                    |                 |                                               |        | DRB1*04:01; HLA-DRB3*02:02                                                                               | HLA-B*35:01; HLA-B*53:01; HLA-B*57:01; HLA-B*58:01                                                                                                                                                                          |
| CFHAIHVSGTNGTKRFDN<br>PVLPF        | 65-84<br>(D1)   | H-2-Kb, H-2-Qa1                               | H2-IEd | HLA-DRB3*02:02;<br>HLA-DRB1*04:01;<br>HLA-DPA1*01:03/DPB1*04:01                                          | HLA-A*03:01; HLA-A*11:01; HLA-A*23:01; HLA-A*24:02; HLA-A*30:01; HLA-A*30:02; HLA-A*32:01; HLA-A*33:01; HLA-A*68:01                                                                                                         |
| CTRGVYYPDKVFRSSVLHS                | 33-50<br>(E1)   | H-2-Dd                                        | H2-IEd | HLA-DPA1*02:01/DPB1*05:01; HLA-DRB1*03:01; HLA-DRB1*04:01; LA-DRB1*13:02; HLA-DRB3*01:01; HLA-DRB3*02:02 | HLA-A*03:01; HLA-A*11:01; HLA-A*24:02; HLA-A*30:01; HLA-A*30:02; HLA-A*31:01; HLA-A*32:01; HLAA*33:01; HLA-A*68:01; HLA-B*07:02; HLA-B*08:01; HLA-B*15:01; HLA-B*35:01; HLA-B*51:01; HLA-B*53:01                            |
| CYQTQTNSPRRARSVAS                  | 674-689<br>(F1) | H-2-Dd                                        | N/A    | HLA-DRB1*04:01                                                                                           | HLA-A*03:01; HLA-A*11:01; HLA-A*30:01; HLA-A*33:01; HLA-A*68:01; HLA-B*07:02; HLA-B*08:01                                                                                                                                   |
| CVIAWNSNNLDSKVGGN<br>Y             | 433-449<br>(G1) | H-2-Db, H-2-Kb                                | N/A    | HLA-DRB3*02:02;<br>HLA-DRB1*13:02                                                                        | HLA-A*01:01; HLA-A*30:02; HLA-A*68:02                                                                                                                                                                                       |
| CALDPLSETKCTLKSFTVE<br>KGIYQTSNFRV | 291-320<br>(H1) | H-2-Dd, H-2-Kb,<br>H-2-Kd H-2-Qa1             | N/A    | N/A                                                                                                      | HLA-A*01:01; HLA-A*03:01; HLA-A*11:01; HLA-A*23:01; HLA-A*24:02; HLA-A*30:01; HLA-A*30:02; HLA-A*31:01; HLA-A*32:01; HLA-A*33:01; HLA-A*68:01; HLA-A*68:02; HLA-B*44:01; HLA-B*51:01; HLA-B*53:01; HLA-B*57:01; HLA-B*58:01 |
| CATVCGPKKSTNLVKNK<br>CVNFNFNG      | 522-545<br>(I1) | H-2-Db, H-2-Dd,<br>H-2-Kb, H-2-Ld;<br>H-2-Qa1 | N/A    | LA-DRB1*13:02;<br>HLA-DRB3*02:02                                                                         | HLA-A*03:01; HLA-A*11:01; HLA-A*30:01; HLA-A*31:01; HLA-B*07:02; HLA-B*08:01; HLA-B*15:01; HLA-B*51:01                                                                                                                      |

|                                            |                 |                                         |        |                                                                                                                                                                                                                                                                            |                                                                                                                                                                                                   |
|--------------------------------------------|-----------------|-----------------------------------------|--------|----------------------------------------------------------------------------------------------------------------------------------------------------------------------------------------------------------------------------------------------------------------------------|---------------------------------------------------------------------------------------------------------------------------------------------------------------------------------------------------|
| CYNYLYRLFRKSNLKPFER<br>DISTEIYQA           | 452-476<br>(J1) | H-2-Kk, H-2-Qa2                         | H2-IEd | HLA-DPA1*01:03/DPB1*02:01; HLA-DPA1*01:03/DPB1*04:01; HLA-DPA1*02:01/DPB1*01:01; HLA-DPA1*02:01/DPB1*05:01; HLA-DRB1*04:01; HLA-DRB1*04:05; HLA-DRB1*07:01; HLA-DRB1*08:02; HLA-DRB1*11:01; HLA-DRB1*12:01; HLA-DRB1*15:01; HLA-DRB3*01:01; HLA-DRB3*02:02; HLA-DRB5*01:01 | HLA-A*01:01; HLA-A*03:01; HLA-A*11:01; HLA-A*23:01; HLA-A*24:02; HLA-A*30:01; HLA-A*31:01; HLA-A*33:01; HLA-A*68:02; HLA-B*07:02; HLA-B*08:01; HLA-B*15:01; HLA-B*40:01; HLA-B*44:02; HLA-B*44:03 |
| CIAVEQDKNTQEVFAQV                          | 770-783<br>(A2) | H-2-Db, H-2-Kb, H-2-Kk, H-2-Qa2         | N/A    | N/A                                                                                                                                                                                                                                                                        | HLA-A*02:01; HLA-A*02:03; HLA-A*02:06; HLA-A*26:01; HLA-A*68:02; HLA-B*15:01; HLA-B*40:01; HLA-B*44:02; HLA-B*44:03; HLA-B*51:01                                                                  |
| CKQIYKTPPIKDFGGFNFS<br>QILPDPSKPSKRSFIEDLL | 786-822<br>(B2) | H-2-Db, H-2-Dd, H-2-Kb, H-2-Kd, H-2-Qa2 | H2-IAb | HLA-DPA1*01:03/DPB1*02:01; HLA-DPA1*01:03/DPB1*04:01; LA-DPA1*02:01/DPB1*01:01; HLA-DQA1*01:01/DQB1*05:01; HLA-DRB1*03:01; HLA-DRB1*04:01; HLA-                                                                                                                            | HLA-A*02:01; HLA-A*02:03; HLA-A*02:06; HLA-A*03:01; HLA-A*11:01; HLA-A*23:01; HLA-A*24:02; HLA-A*30:01; HLA-A*32:01; HLA-A*68:01; HLA-B*07:02; HLA-B*08:01; HLA-B*35:01; HLA-B*53:01; HLA-B*57:01 |

|                                               |                   |                                     |        |                                                                                            |                                                                                                                                                            |
|-----------------------------------------------|-------------------|-------------------------------------|--------|--------------------------------------------------------------------------------------------|------------------------------------------------------------------------------------------------------------------------------------------------------------|
|                                               |                   |                                     |        | DRB1*04:05; HLA-<br>DRB1*09:01                                                             |                                                                                                                                                            |
| CNSAIGKIQDSLSTASAL                            | 927-945<br>(C2)   | H-2-Kd, H-2-Qa1                     | H2-IAb | HLA-DRB1*04:01;<br>HLA-DRB1*08:02                                                          | HLA-A*02:01; HLA-A*02:03; HLA-A*68:02; HLA-B*07:02; HLA-B*08:01                                                                                            |
| CPLQPELDSFKEELDKYFK<br>NHTSPDVDLGDIS          |                   | H-2-Kd                              | N/A    | HLA-DPA1*02:01/DPB1*05:01; HLA-DRB1*04:01; HLA-DRB1*04:05; HLA-DRB1*13:02; HLA-DRB3*02:02  | HLA-A*01:01; HLA-A*23:01; HLA-A*24:02; HLA-A*26:01; HLA-A*30:01; HLA-A*30:02; HLA-B*08:01; HLA-B*35:01; HLA-B*44:03; HLA-B*53:01                           |
| CVPAQEKNFTTAPAICHD<br>GKAHFPREGVFVSNGTH<br>WF | 1068-1103<br>(E2) | H-2-Db, H-2-Kb,<br>H-2-Kd, H-2-Qa1, | H2-IAb | HLA-DRB1*03:01;<br>HLA-DRB1*13:02;<br>HLA-DRB3*01:01;<br>HLA-DRB3*02:02;<br>HLA-DRB5*01:01 | HLA-A*02:06; HLA-A*23:01; HLA-A*24:02; HLA-A*26:01; HLA-A*30:01; HLA-A*30:02; HLA-B*07:01; HLA-B*15:01; HLA-B*35:01; HLA-B*53:01; HLA-B*57:01; HLA-B*58:01 |
| CMTSCCSCLKGCCSCGSC<br>CKFDEDDSEPVLKGV         | 1236-1267<br>(F2) | H-2-Kk,H-2-Qa2                      | N/A    | N/A                                                                                        | HLA-A*68:02; HLA-B*40:01; HLA-B*44:02; HLA-B*44:03; HLA-B*51:01                                                                                            |
